# Supplementary material for: Systemic analysis of metabolome reconfiguration in Arabidopsis after abiotic stressors uncovers metabolites that modulate defense against pathogens
Source: PubMed Central journal article supplement — Plant Commun. 2023 Jul 4;5(1):100645. doi: 10.1016/j.xplc.2023.100645 (PMC10811363; doi:10.1016/j.xplc.2023.100645), 2023-07-04

**Plant Communications, Volume 5**

**Supplemental information**

**Systemic analysis of metabolome reconfiguration in *Arabidopsis* after abiotic stressors uncovers metabolites that modulate defense against pathogens**

**Antoni Garcia-Molina and Victoria Pastor**

**A**

Cont

HL

Humidity

Drought

Heat

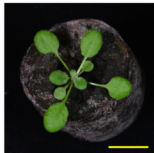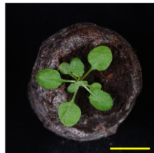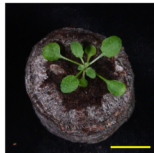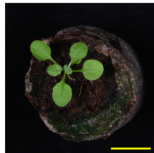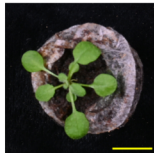

Recovery

Heat-Drought

Heat-HL

Heat-Drought-HL

Cold

Cold-HL

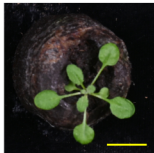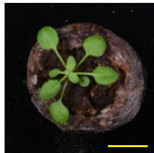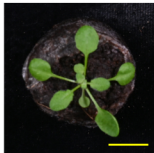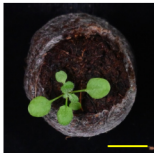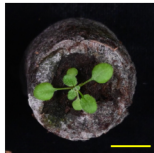**B**

Cont

HL

Humidity

Drought

Heat

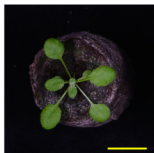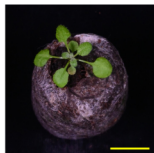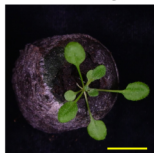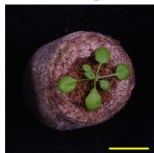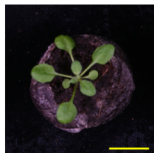

End-point

Heat-Drought

Heat-HL

Heat-Drought-HL

Cold

Cold-HL

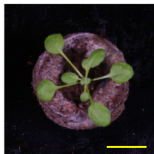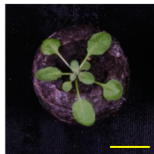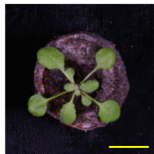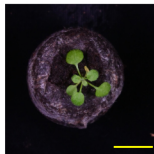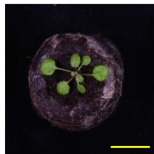

Supplement: mmc1.pdf [file mmc1.pdf]
