# Supplementary material for: Systemic analysis of metabolome reconfiguration in Arabidopsis after abiotic stressors uncovers metabolites that modulate defense against pathogens
Source: PubMed Central journal article supplement — Plant Commun. 2023 Jul 4;5(1):100645. doi: 10.1016/j.xplc.2023.100645 (PMC10811363; doi:10.1016/j.xplc.2023.100645), 2023-07-04

— Exposure to stressor in recovery vs end-point setups

— Last time-points recovery vs control setups

— Last time-points recovery vs end-point setups

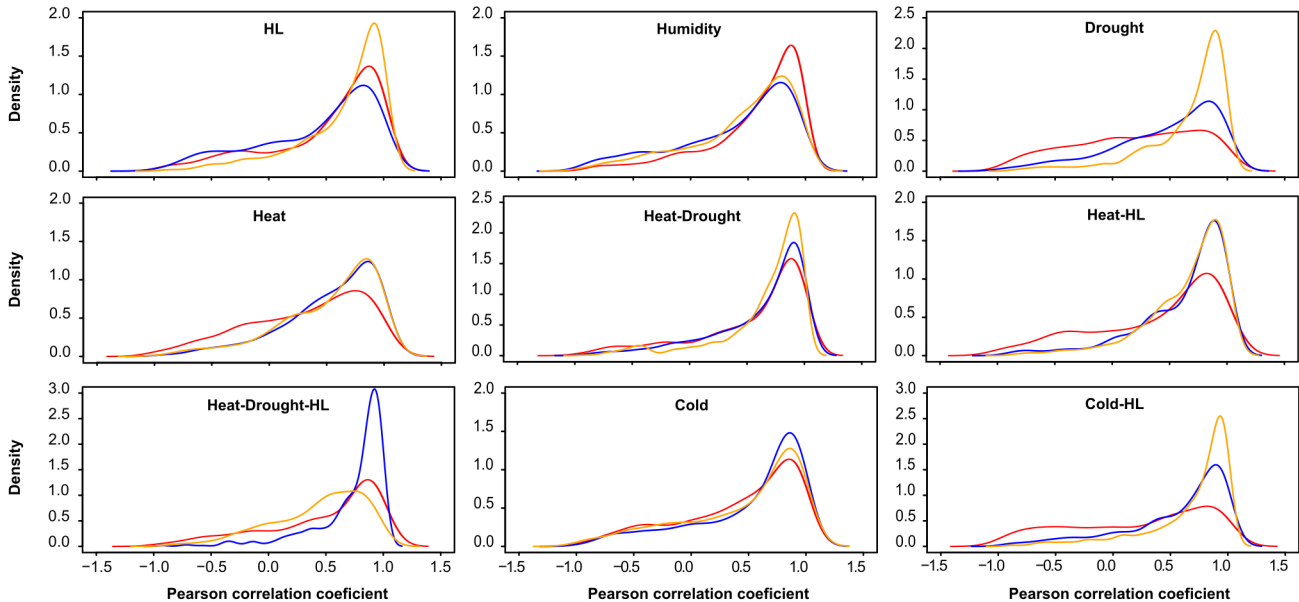

Supplement: mmc4.pdf [file mmc4.pdf]
