# Supplementary figures and images for: Systemic analysis of metabolome reconfiguration in Arabidopsis after abiotic stressors uncovers metabolites that modulate defense against pathogens
Source: PubMed Central journal article supplement — Plant Commun. 2023 Jul 4;5(1):100645. doi: 10.1016/j.xplc.2023.100645 (PMC10811363; doi:10.1016/j.xplc.2023.100645), 2023-07-04

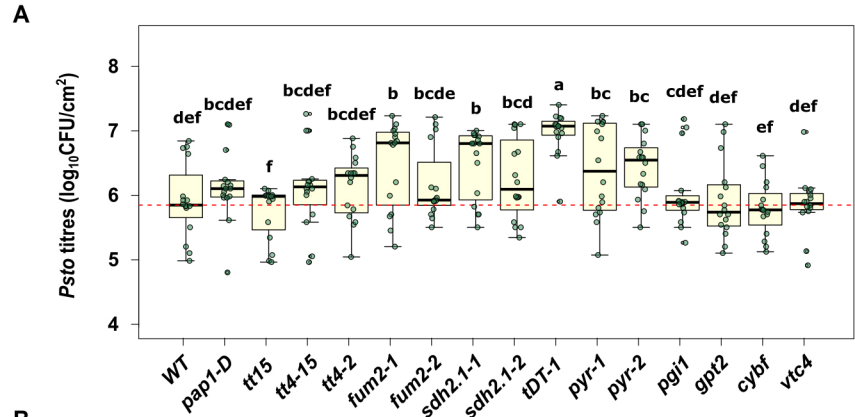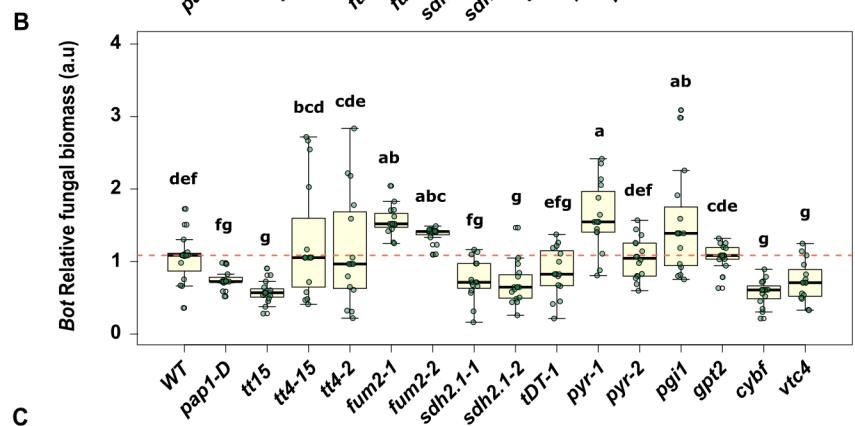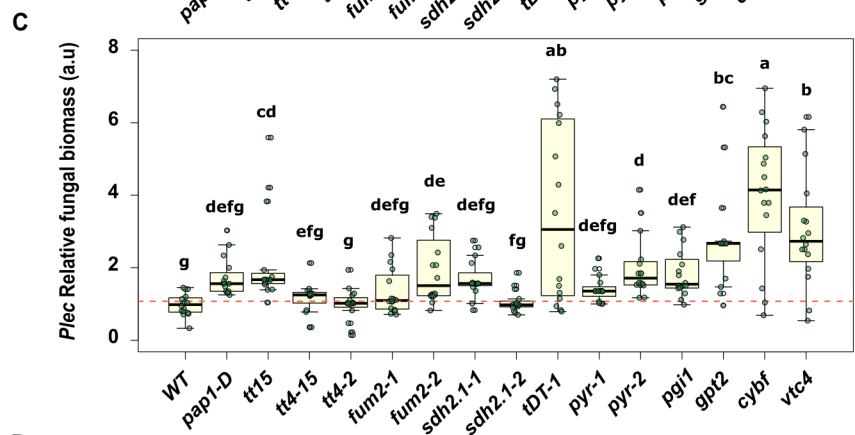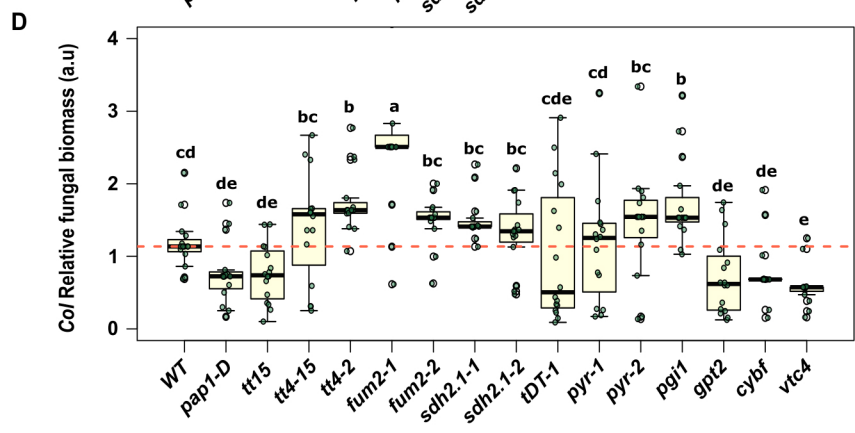

Supplement: mmc10.pdf [file mmc10.pdf]

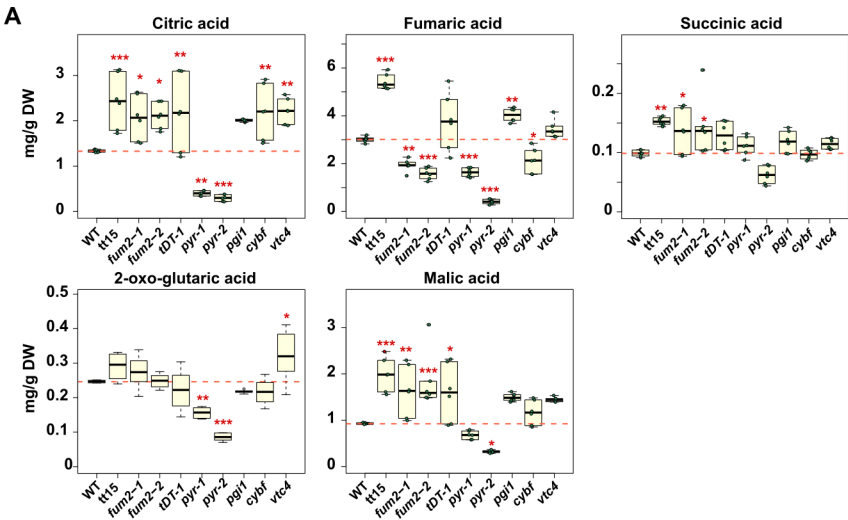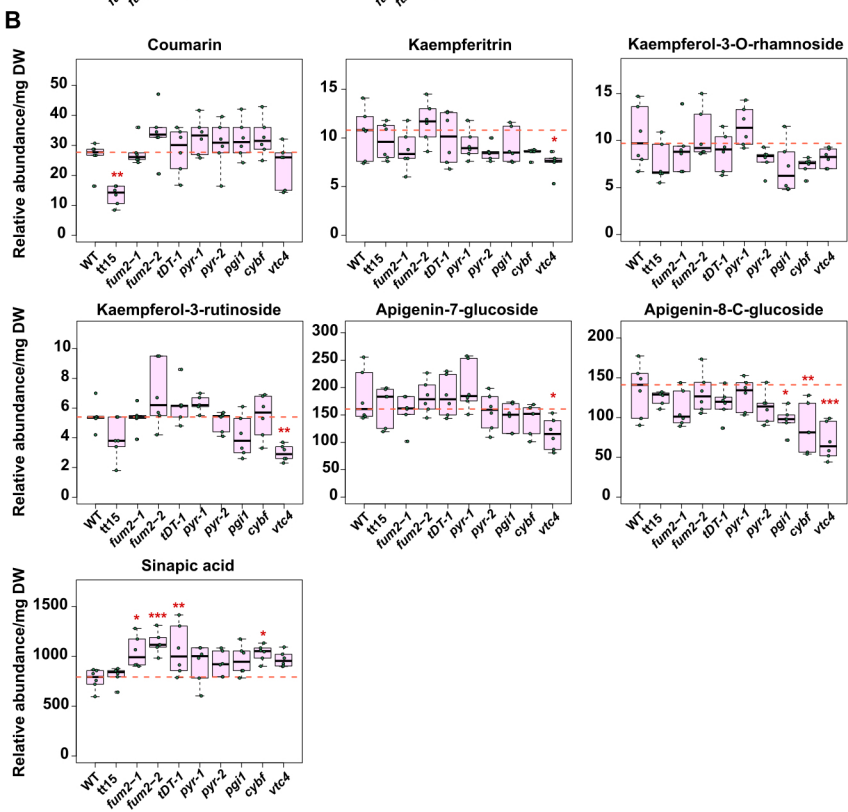

Supplement: mmc11.pdf [file mmc11.pdf]

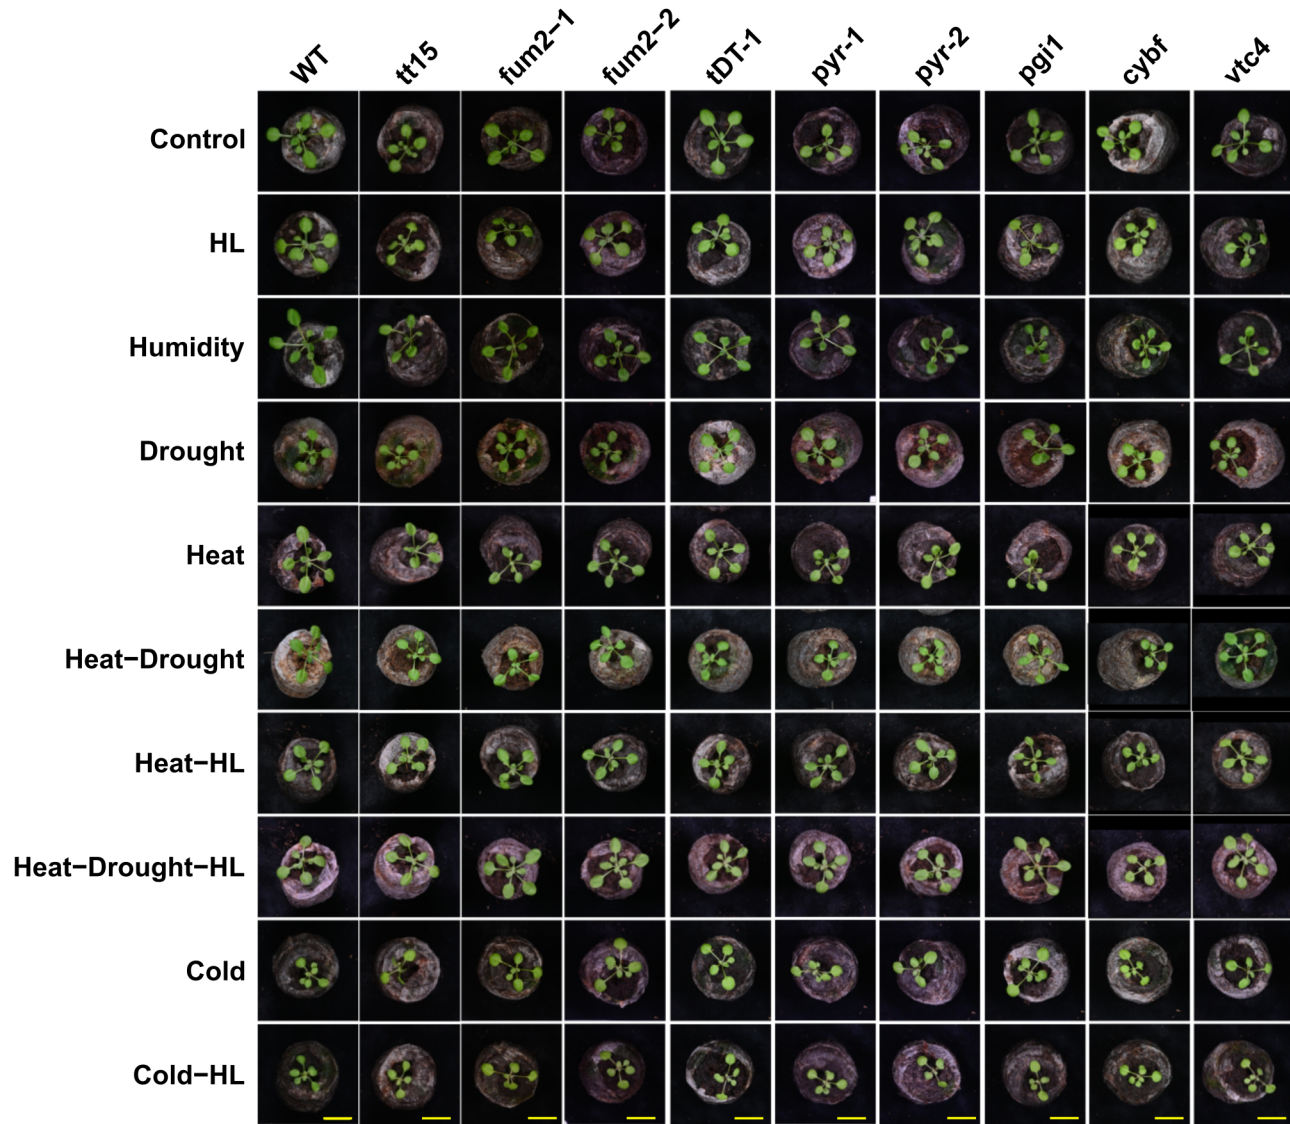

Supplement: mmc12.pdf [file mmc12.pdf]

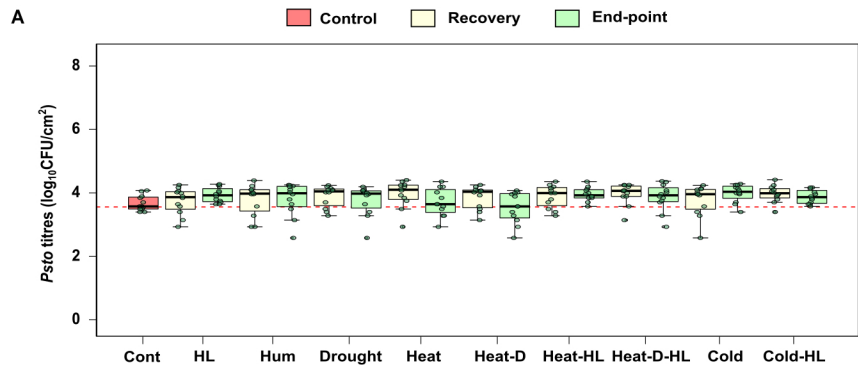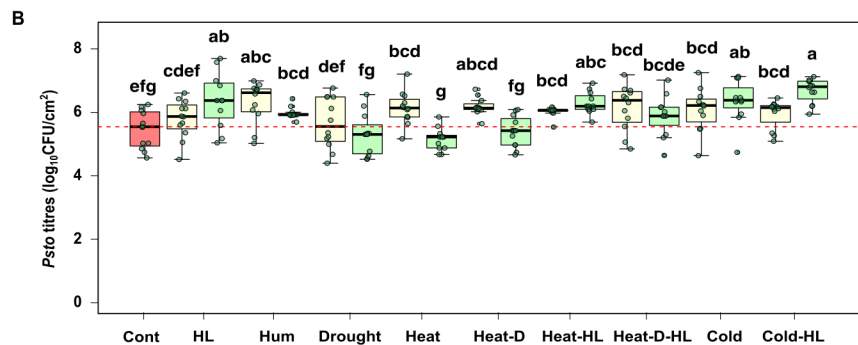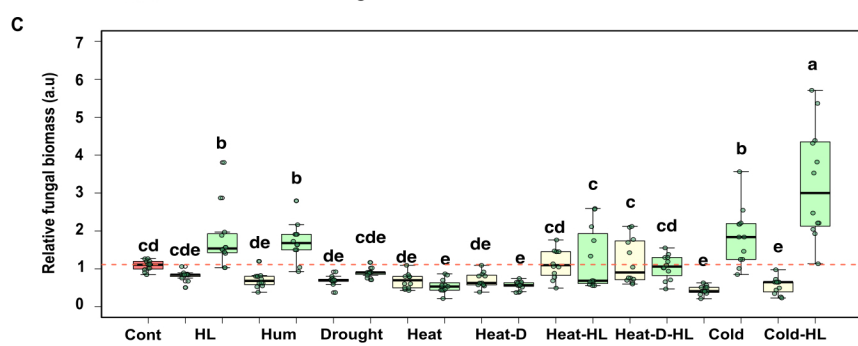

Supplement: mmc2.pdf [file mmc2.pdf]

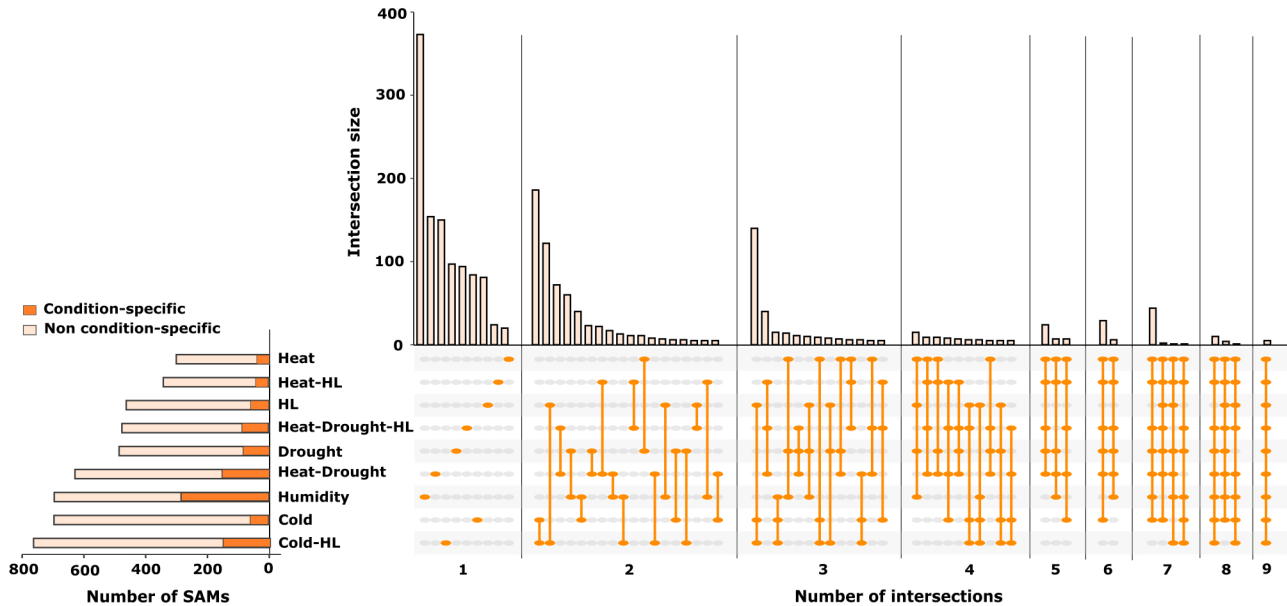

Supplement: mmc3.pdf [file mmc3.pdf]

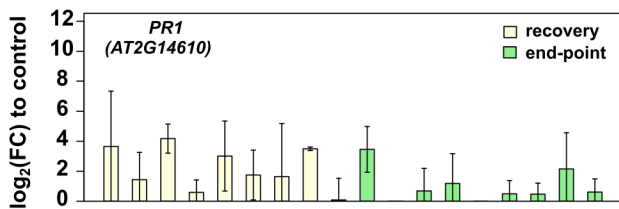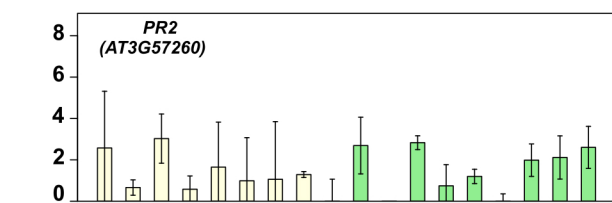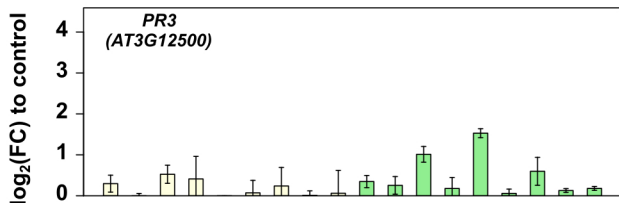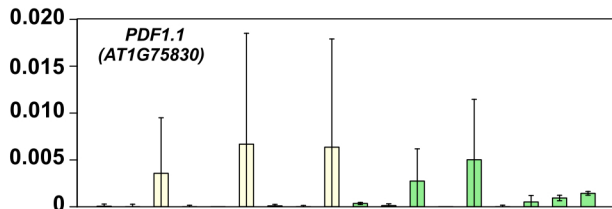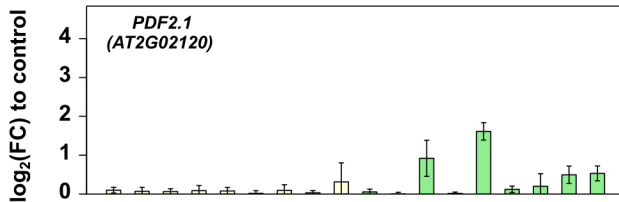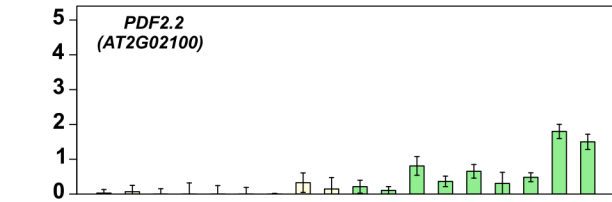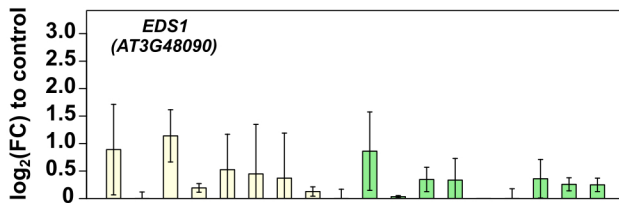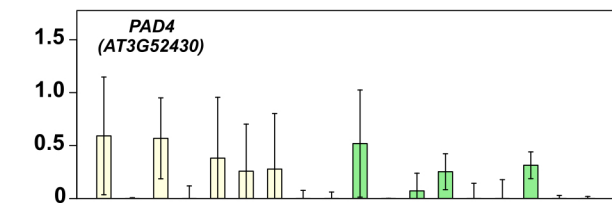

Supplement: mmc6.pdf [file mmc6.pdf]

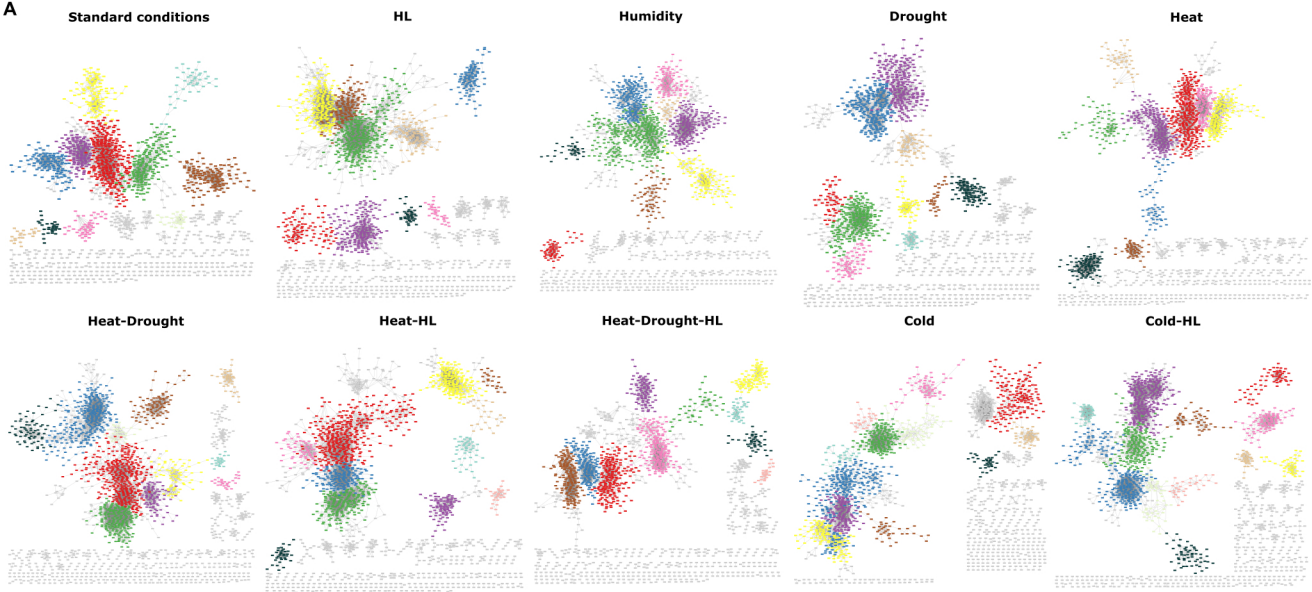

**B**

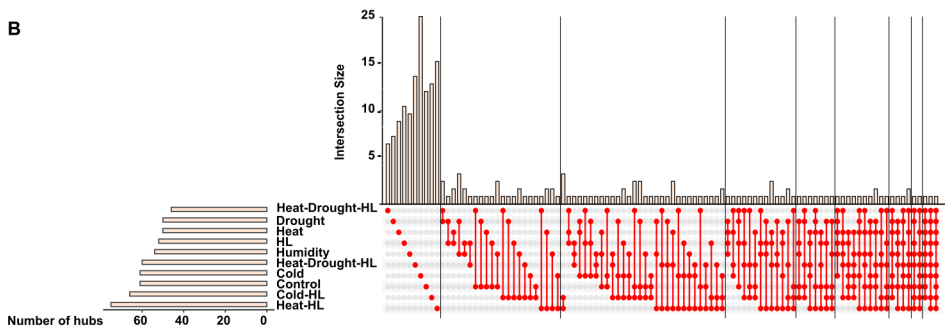

Supplement: mmc7.pdf [file mmc7.pdf]

**A**

■ tolerant  
■ o  
■ susceptible

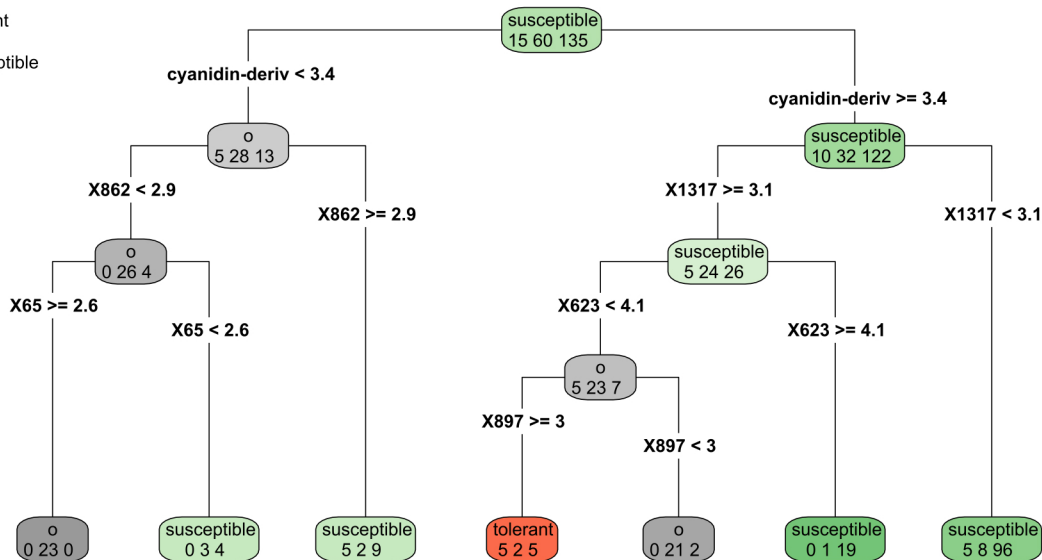**B**

■ tolerant  
■ o  
■ susceptible

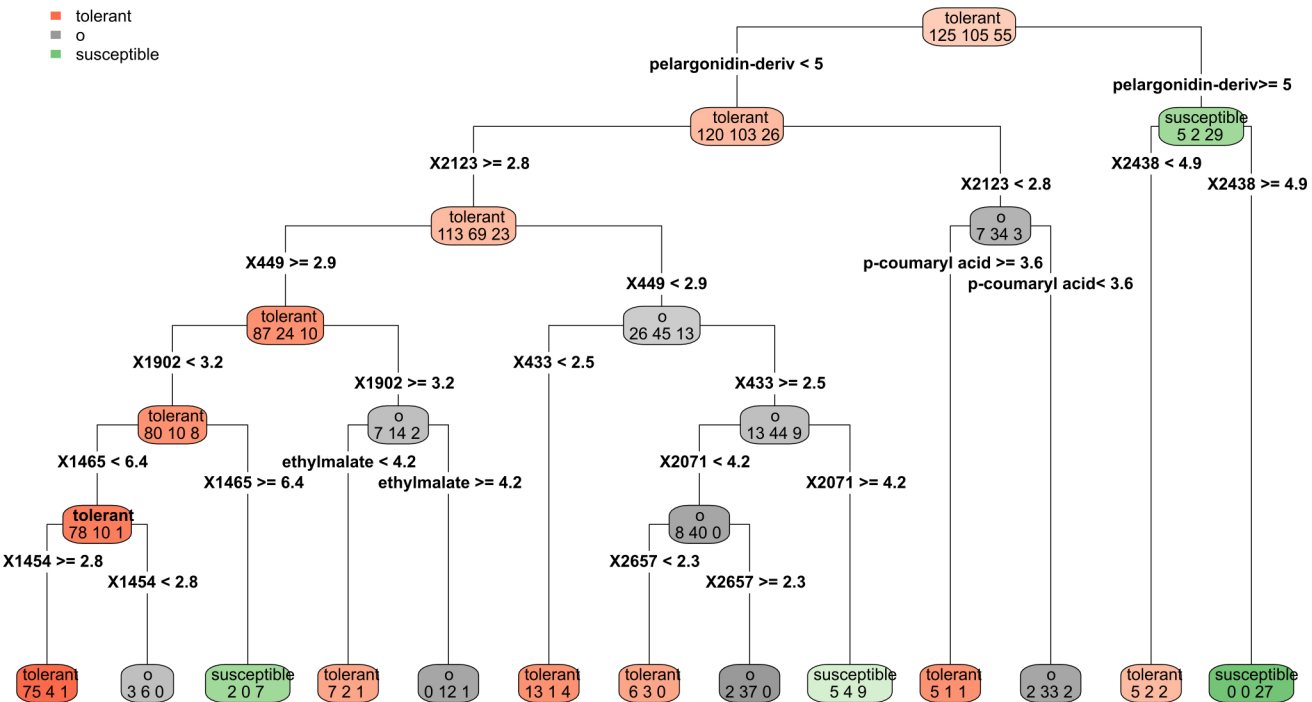

Supplement: mmc8.pdf [file mmc8.pdf]

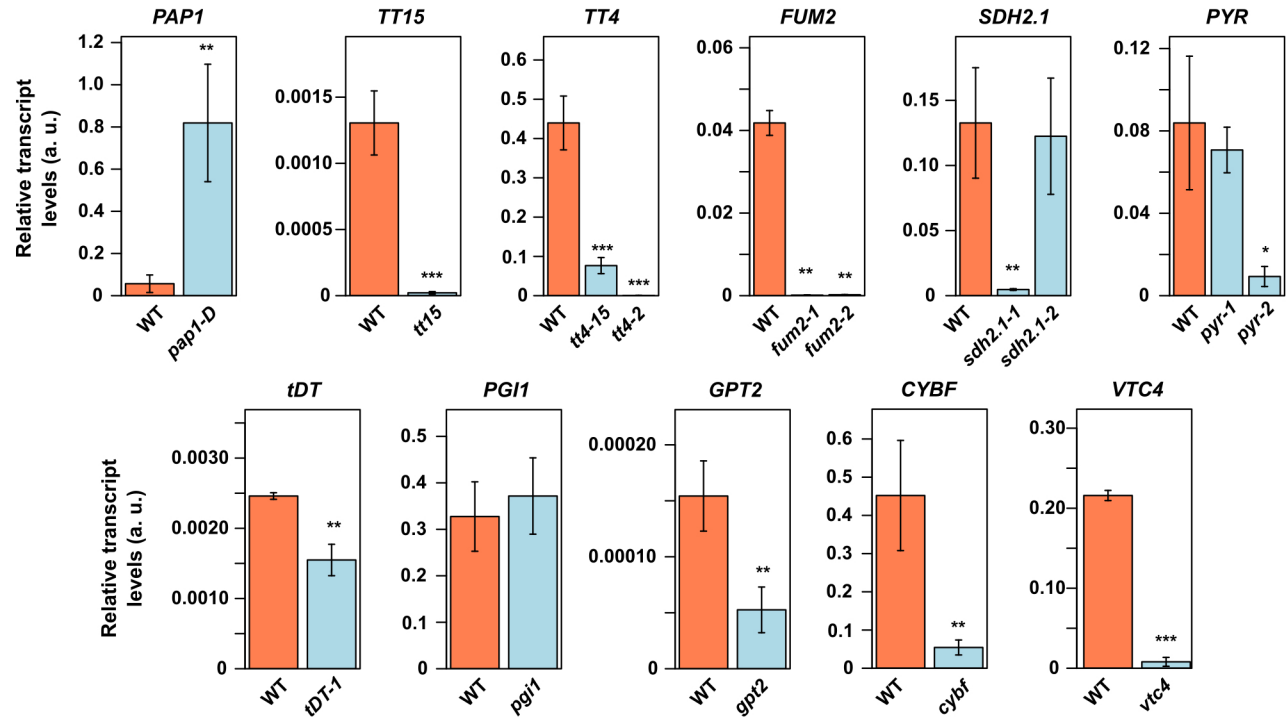

Supplement: mmc9.pdf [file mmc9.pdf]
